# Supplementary material for: Linear and high-molecular-weight poly-porphyrins for efficient photodynamic therapy
Source: Royal Society of Chemistry journal article supplement (doi:10.1039/d1bm00117e), 2021-01-01
Supplement: d1bm00117e1.pdf [file d1bm00117e1.pdf]

## Support Information

### Linear and High-Molecular-Weight Poly-porphyrins for Efficient Photodynamic Therapy

Nan Zheng,<sup>\*,#</sup>,<sup>a</sup> Xiahui Li,<sup>#</sup>,<sup>b</sup> Kangkai Xia,<sup>b</sup> Ruofei Yue,<sup>a</sup> Huijian Wu<sup>\*,b</sup> and Wangze Song<sup>\*,a</sup>

<sup>a</sup> State Key Laboratory of Fine Chemicals, School of Chemical Engineering, Dalian University of Technology, Dalian, 116024, P. R. China.

<sup>b</sup> School of Life Science and Biotechnology, Dalian University of Technology, Dalian 116024, China.

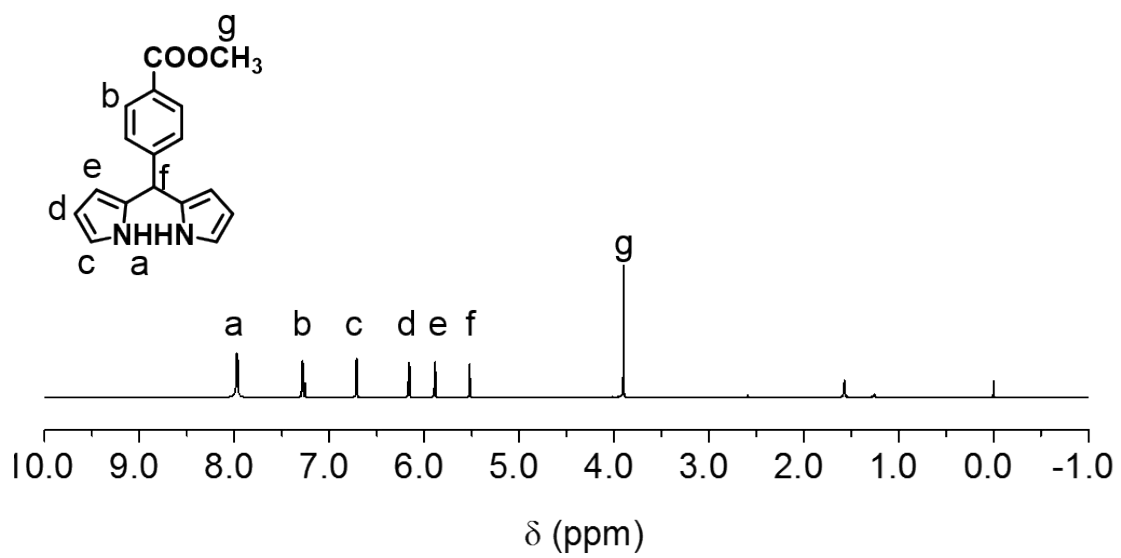

**Figure S1.**  $^1\text{H}$  NMR spectrum of **compound 1** in  $\text{CDCl}_3$ .

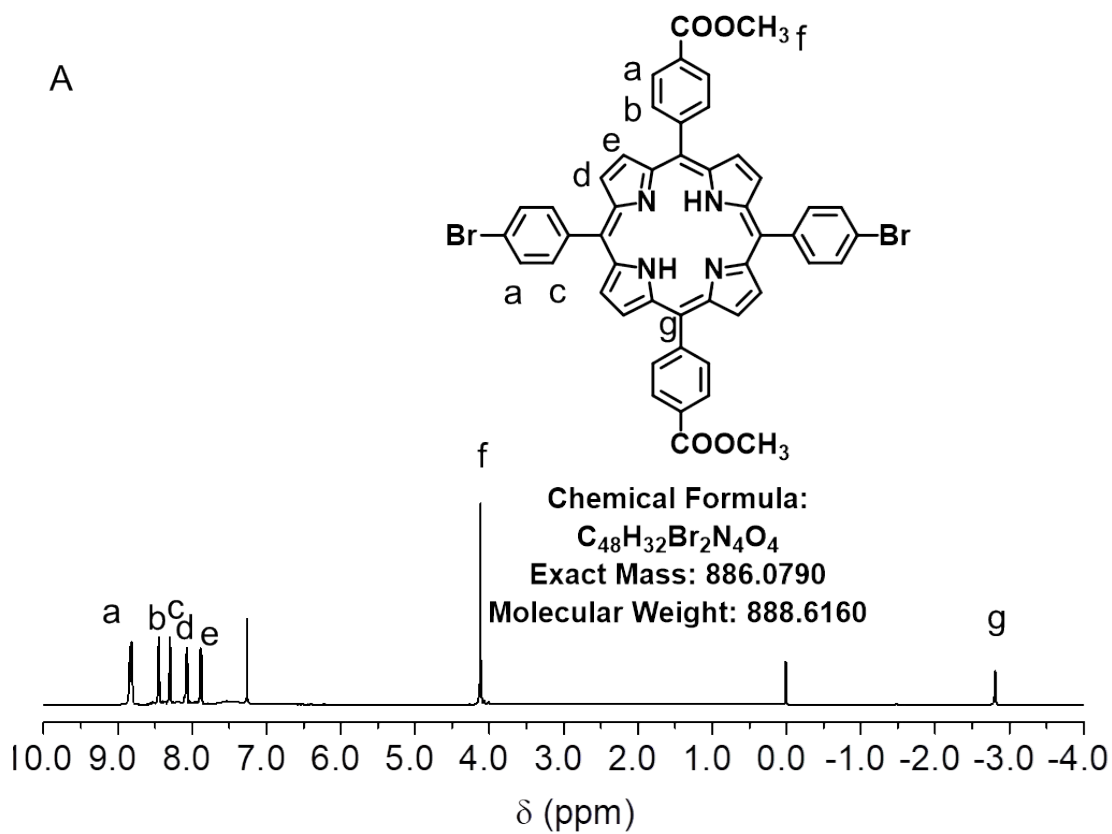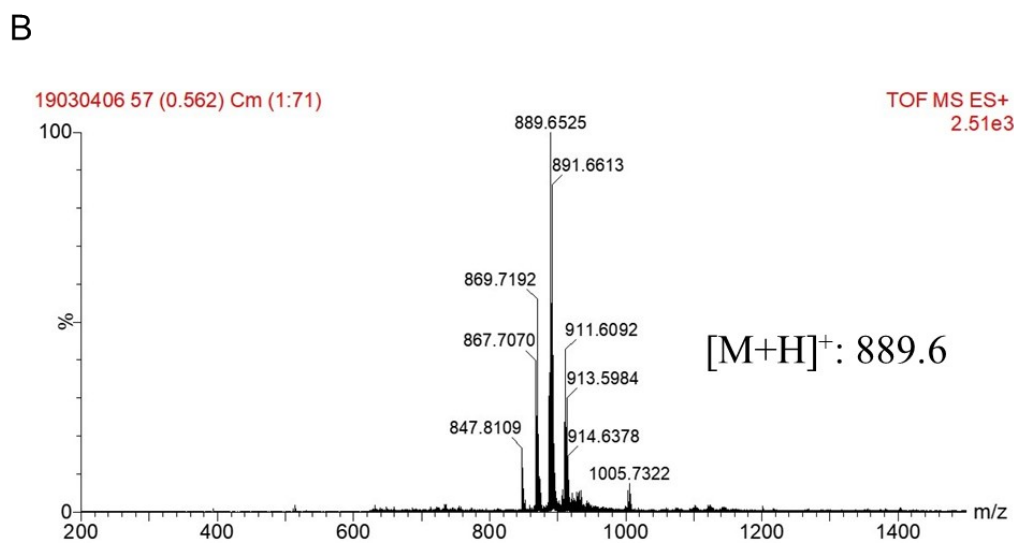

**Figure S2.** (A)  $^1\text{H}$  NMR spectrum of **compound 2** in  $\text{CDCl}_3$ . (B) Mass spectrum of **compound 2**. Observed  $[\text{M}+\text{H}]^+ = 889.6$ .

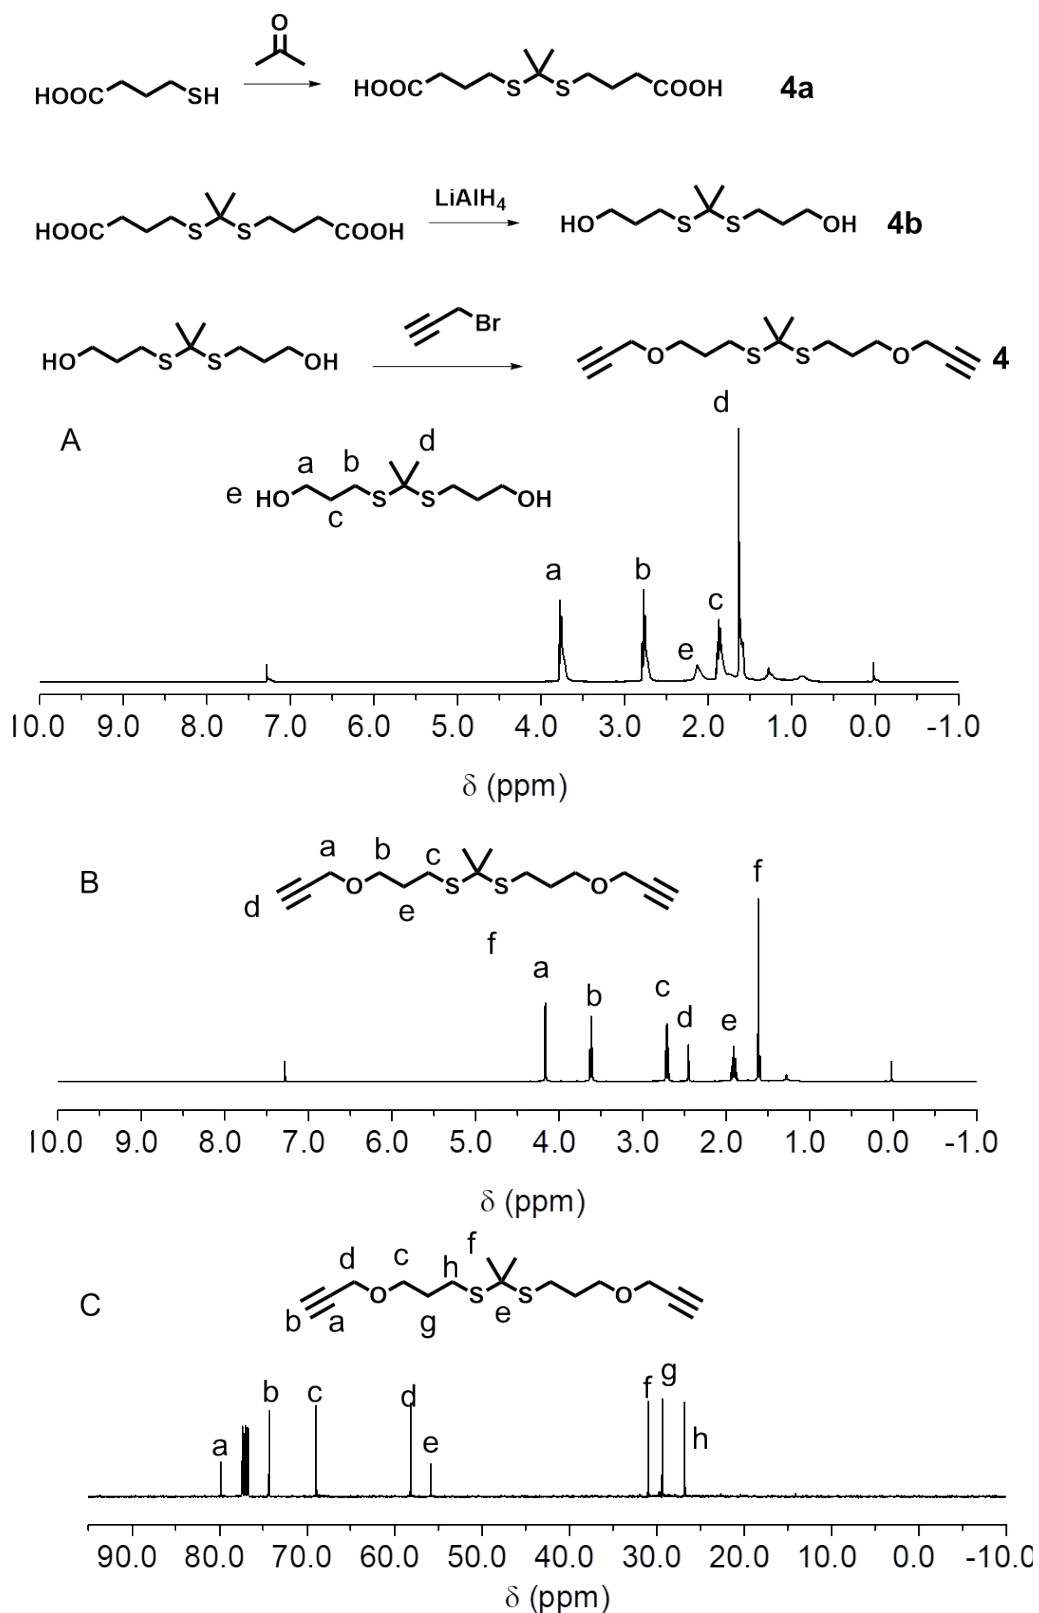

**Figure S3.** (A)  $^1\text{H}$  NMR spectrum of **compound 4b** in  $\text{CDCl}_3$ . (B)  $^1\text{H}$  NMR spectrum of **compound 4** in  $\text{CDCl}_3$ . (C)  $^{13}\text{C}$  NMR spectrum of **compound 4**.

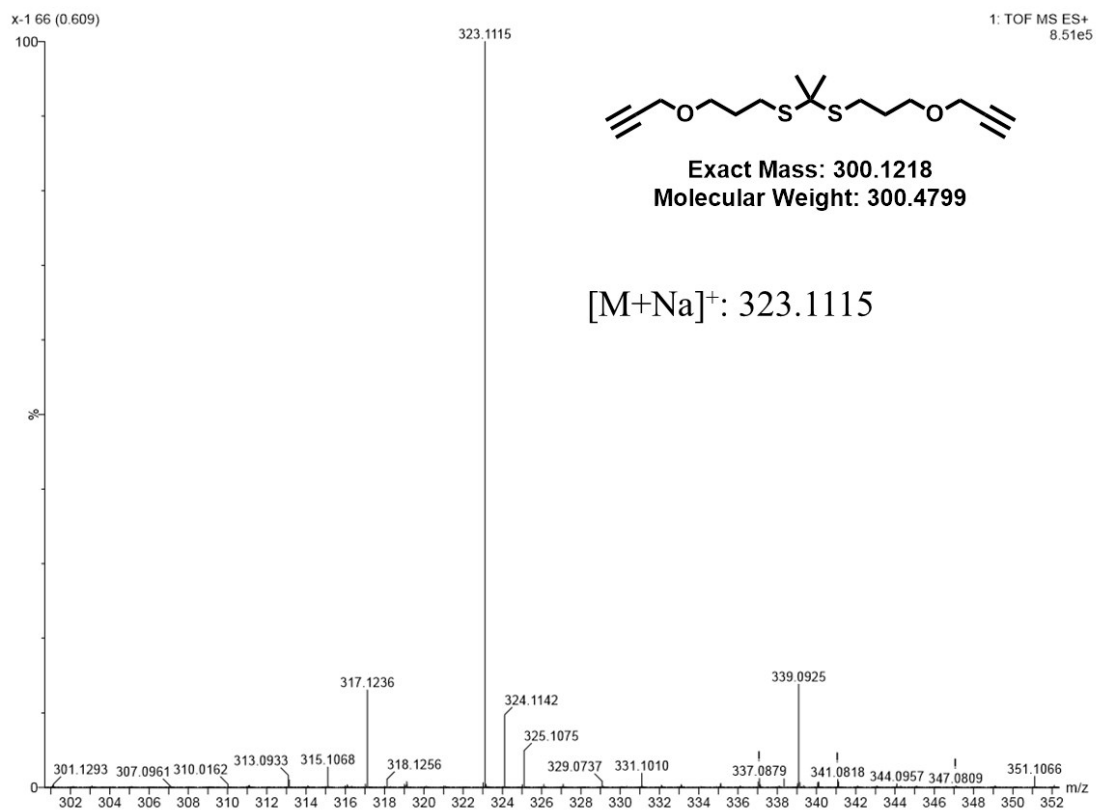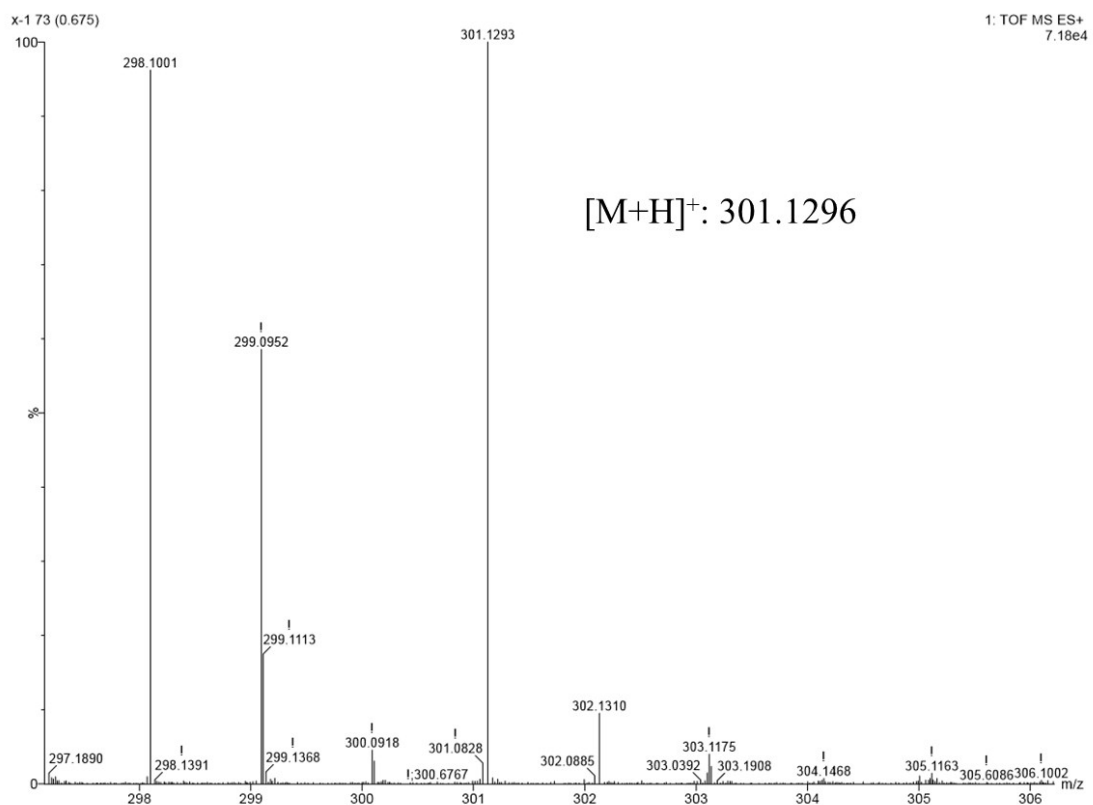

**Figure S4.** HRMS spectrum of **compound 4**. Observed  $[M+Na]^+$  = 323.1115 and Observed  $[M+H]^+$  = 301.1293.

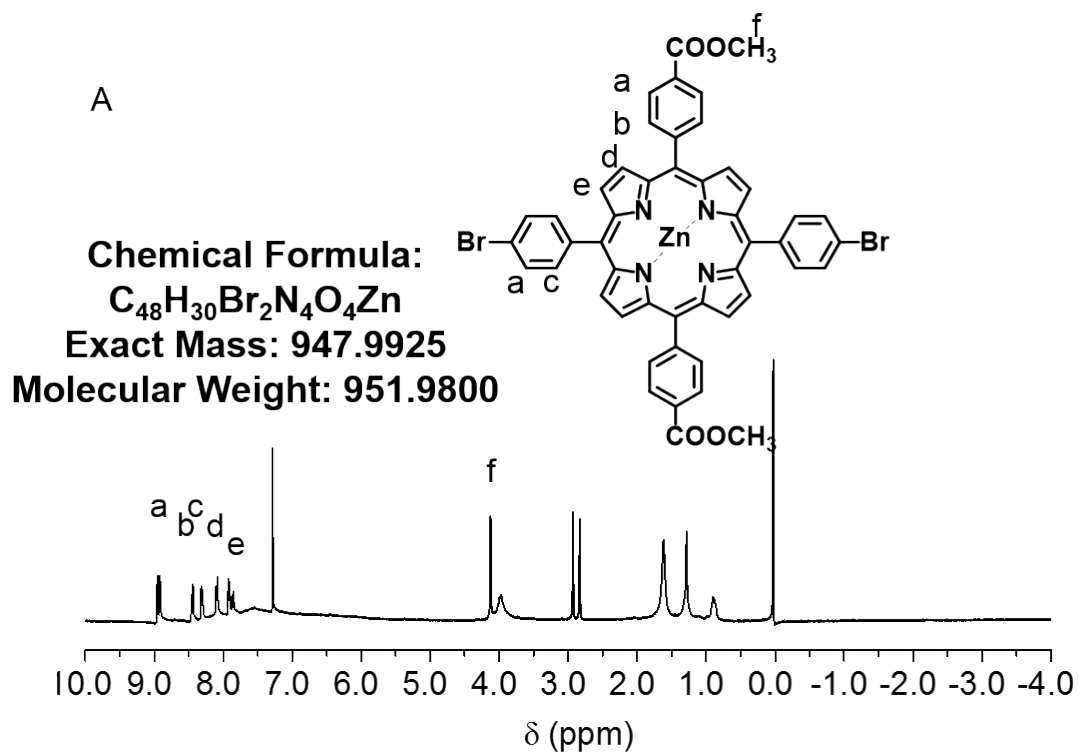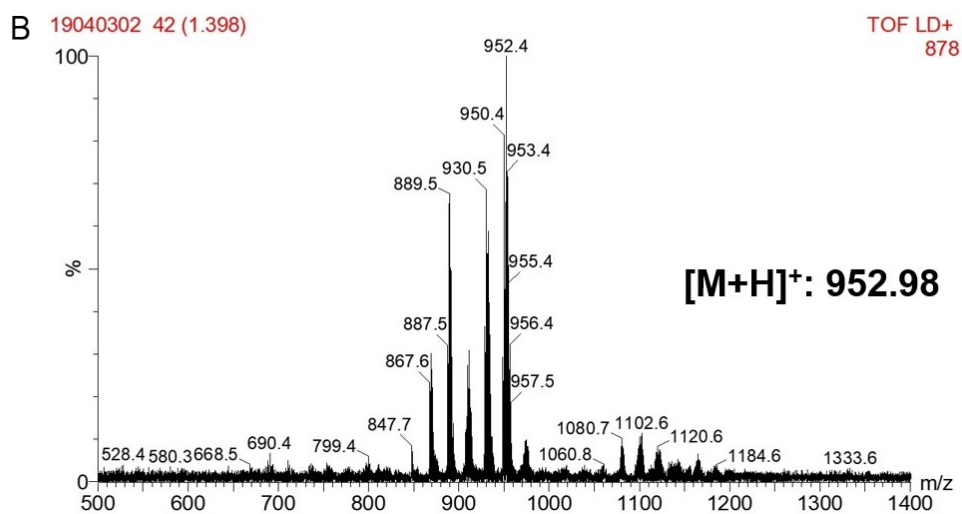

**Figure S5.** (A)  $^1H$  NMR spectrum of **compound 3** in  $CDCl_3$ . (B) MALDI-TOF-MS of **compound 3**. Observed  $[M+H]^+ = 952.4$ .

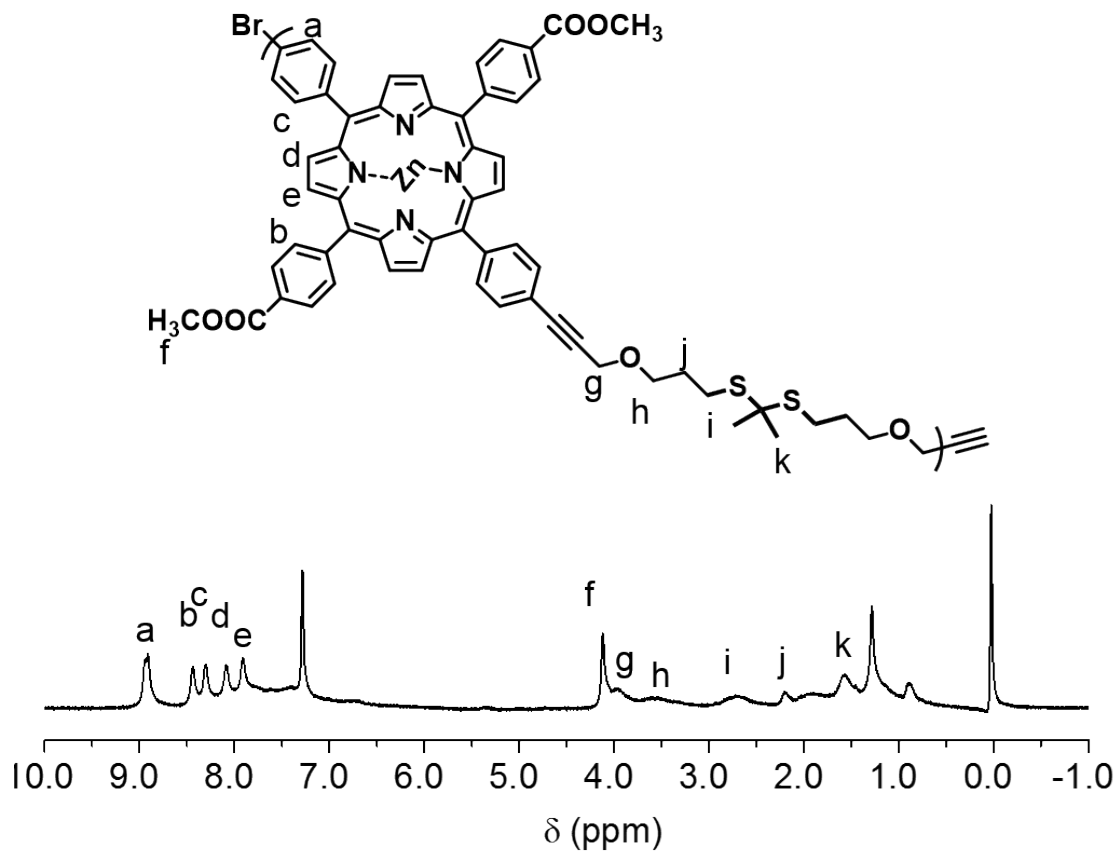

**Figure S6.**  $^1\text{H}$  NMR spectrum of **pP** in  $\text{CDCl}_3$ .

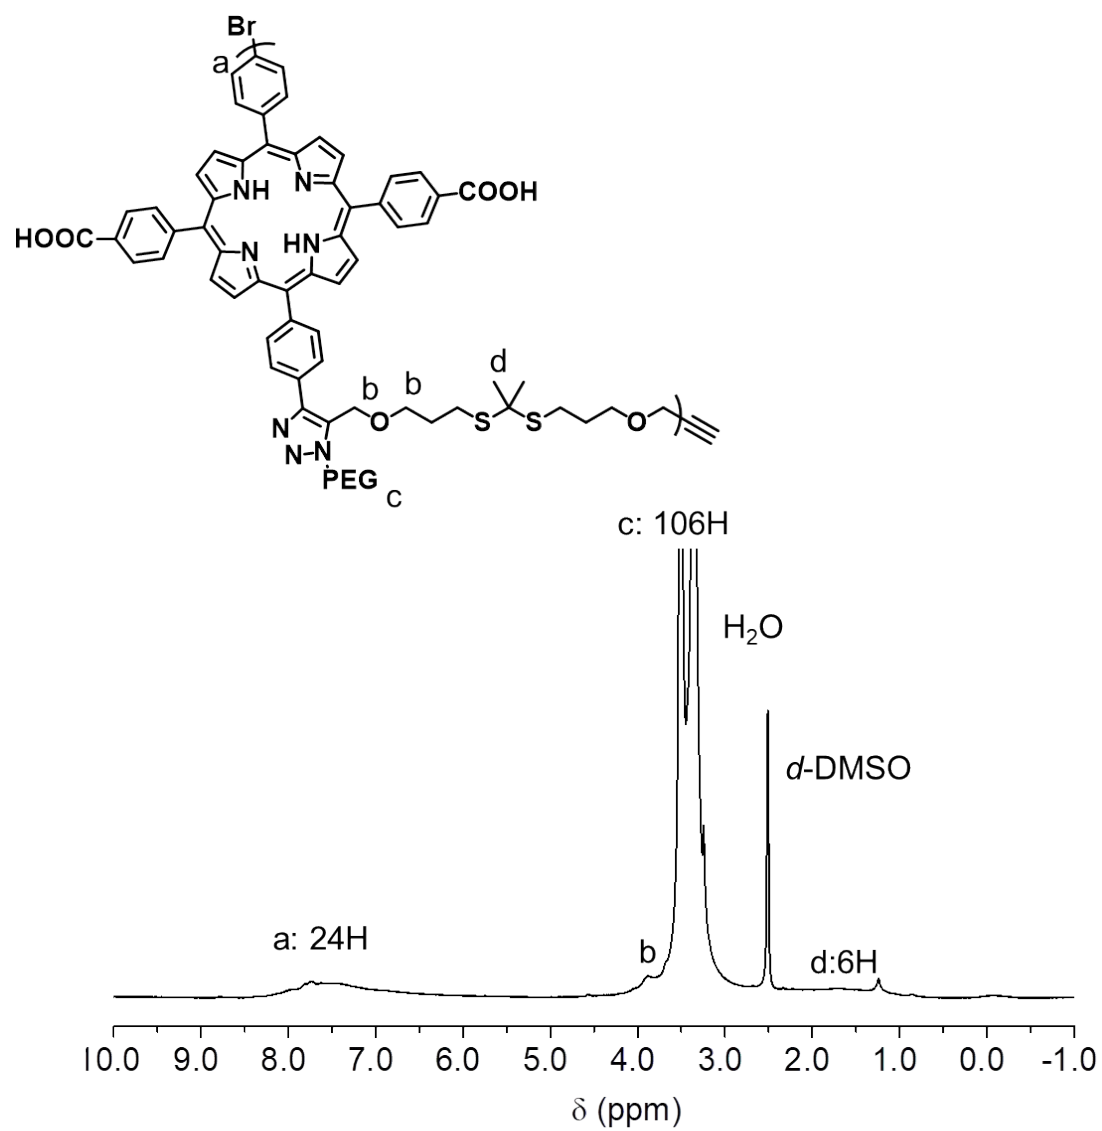

**Figure S7.** <sup>1</sup>H NMR spectrum of pP-PEG in *d*-DMSO.



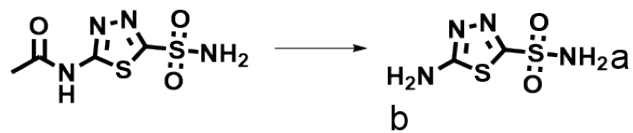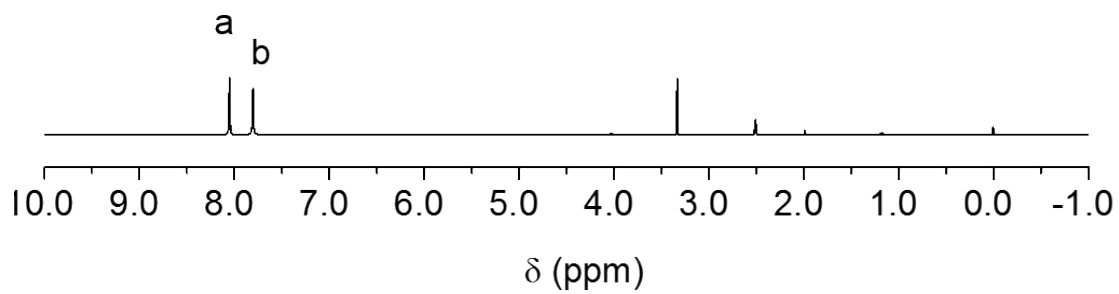

**Figure S8.** <sup>1</sup>H NMR spectrum of AZ-amine in *d*-DMSO.

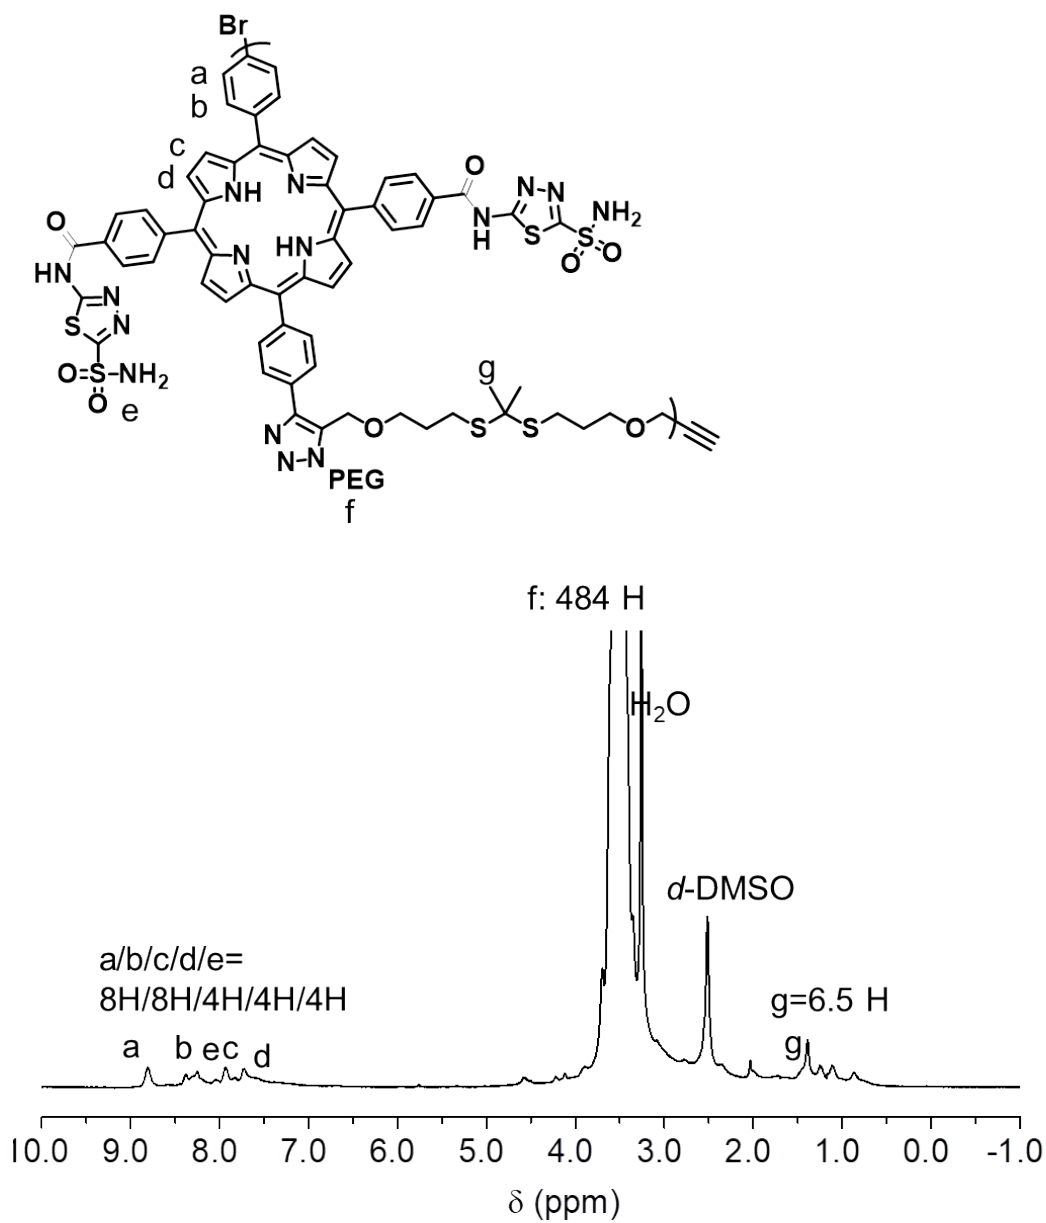

**Figure S9.**  $^1\text{H}$  NMR spectrum of **pP-PEG-AZ** in  $d\text{-DMSO}$ .

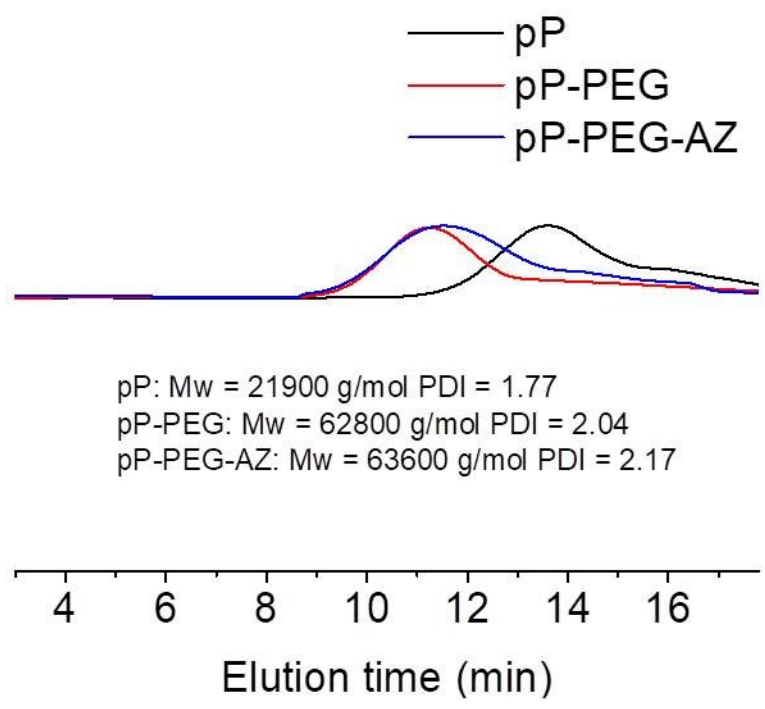

**Figure S10.** GPC curves of pP, pP-PEG and pP-PEG-AZ.

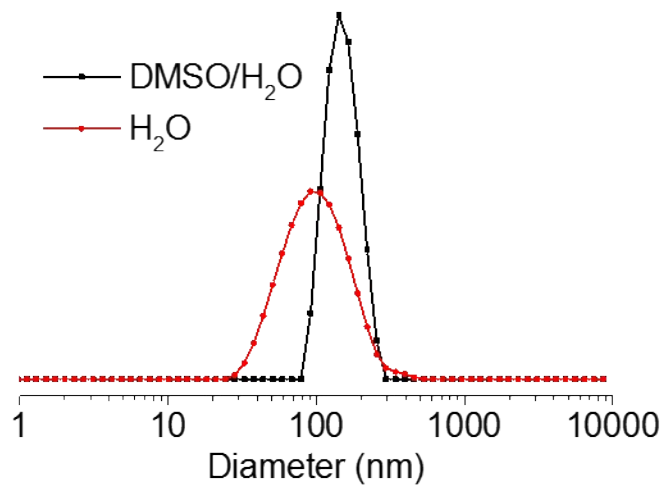

**Figure S11.** Size distribution of pP-PEG-AZ NPs formed by two methods.

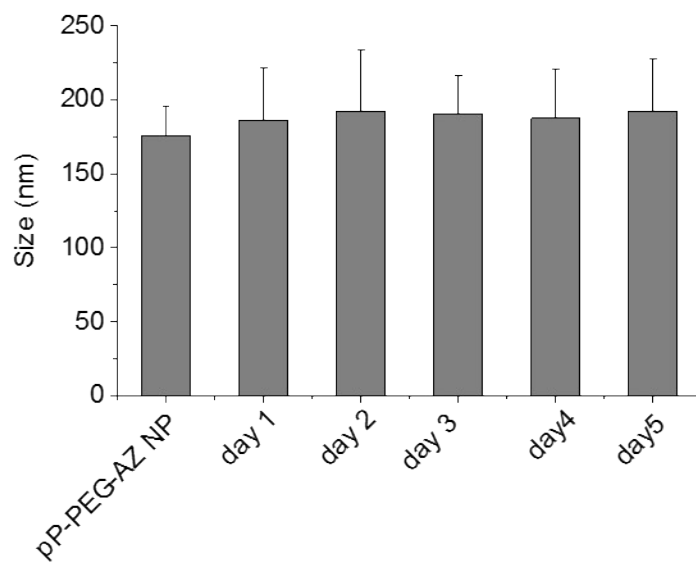

**Figure S12** Particle sizes of pP-PEG-AZ NPs for different time incubation.

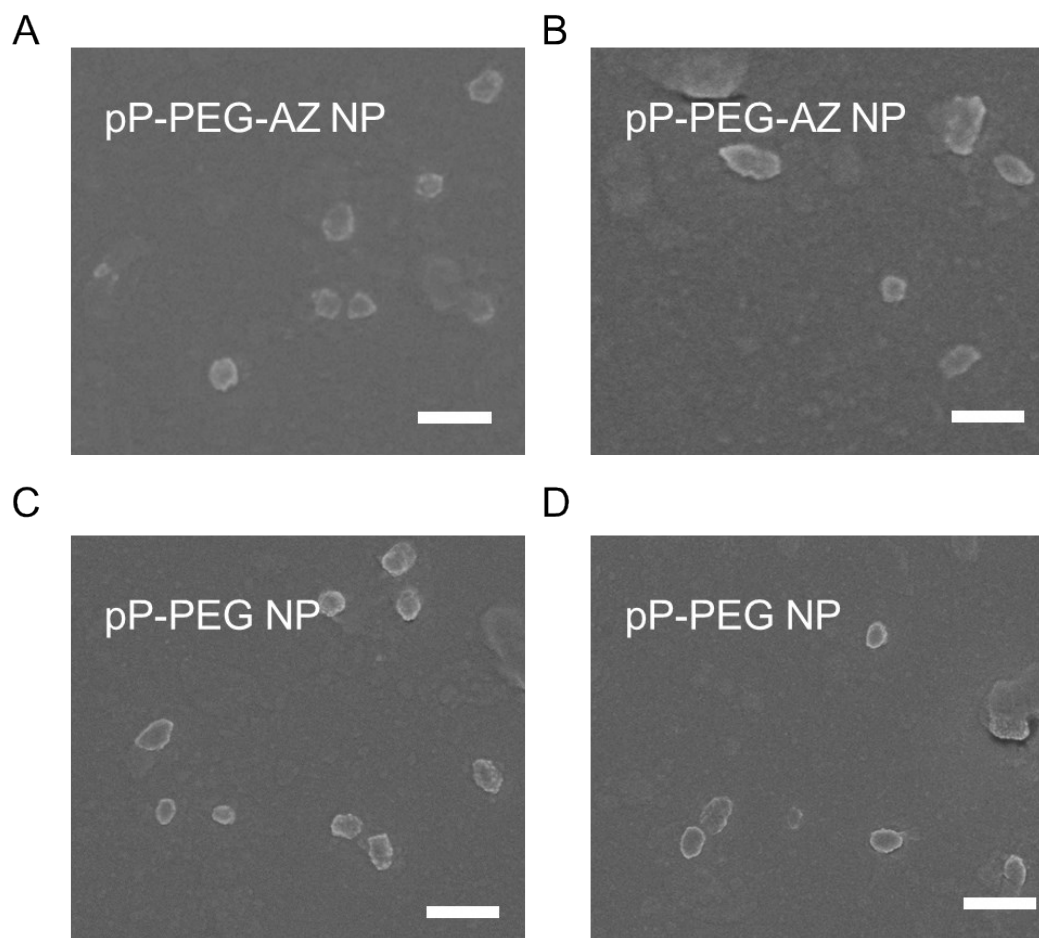

**Figure S13.** SEM image of pP-PEG-AZ NPs (A and B) and pP-PEG NPs (C and D). Bar = 500 nm.

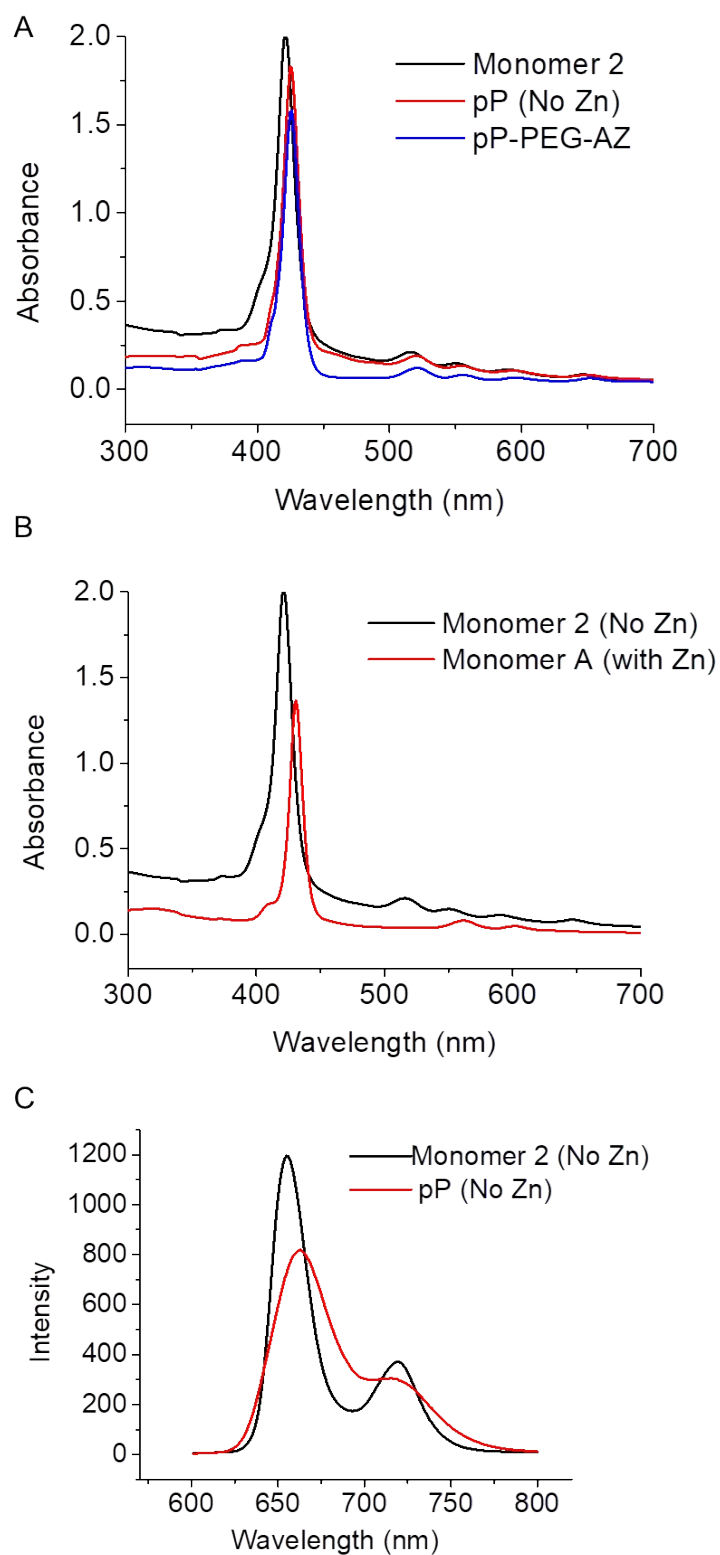

**Figure S14.** (A) (A) UV-vis spectra of the monomer 2, pP (no Zn), and pP-PEG-AZ NPs. (B) UV-vis absorbance spectra of monomer 2 (No Zn) and monomer A (Zn coordinated). (C) Fluorescence emission spectrum of the monomer 2 and pP ( $\lambda_e = 420$  nm). Solvent: DMSO. Concentration: porphyrin moiety of  $7.5 \times 10^{-6}$  M.

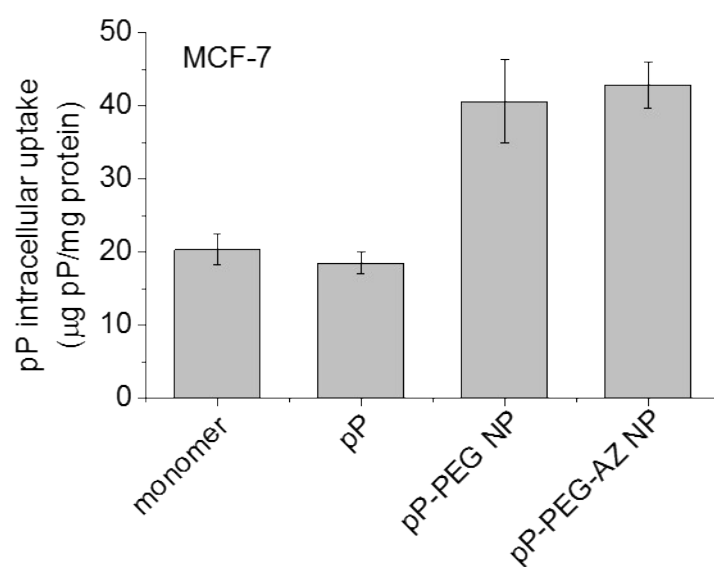

**Figure S15** Intracellular internalization level of the monomer, pP, pP-PEG NPs, and pP-PEG-AZ NPs in MCF-7 cells. Incubation time: 12 h. n = 3.



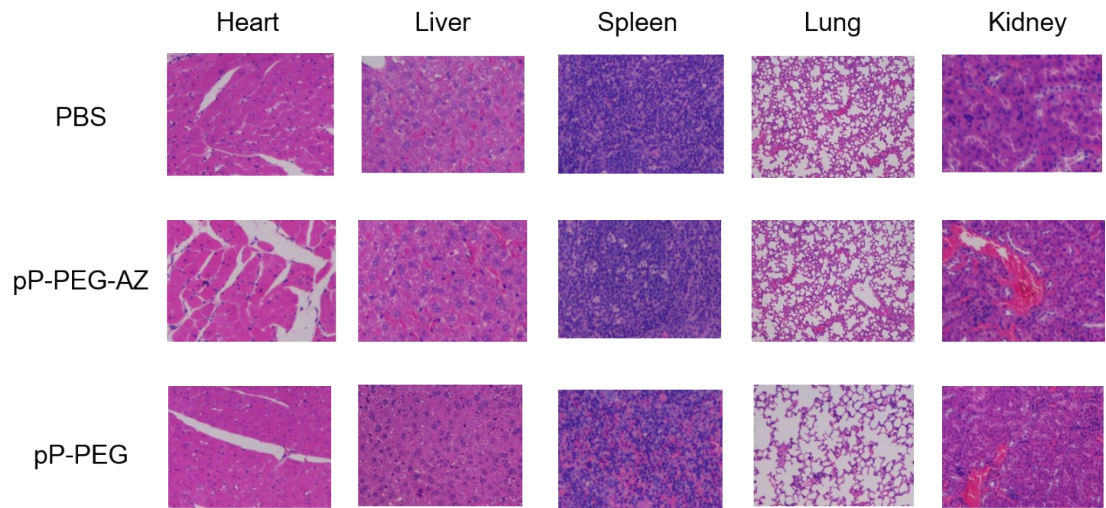

**Figure S16.** H&E staining images of normal tissues of the mice after different treatments.
